# Supplementary material
Source: PubMed Central journal article supplement (PMC3761311)
Supplement: eb64d61e01f85a518e0f1ec06764e895_genetics.113.151340-1.pdf [file eb64d61e01f85a518e0f1ec06764e895_genetics.113.151340-1.pdf]

**Table S1 Summary of changes in gene and transcript annotations at FlyBase and WormBase over the past six years.**

| FlyBase release                                               | r5.3         | r5.6         | r5.16        | r5.26        | r5.34        | r5.44        | r5.50        |
|---------------------------------------------------------------|--------------|--------------|--------------|--------------|--------------|--------------|--------------|
| Date                                                          | 2007-<br>Aug | 2008-<br>Mar | 2009-<br>Mar | 2010-<br>Mar | 2011-<br>Mar | 2012-<br>Mar | 2013-<br>Mar |
| All genes                                                     | 15096        | 15089        | 15073        | 14721        | 15183        | 15569        | 16093        |
| Genes added (compared with r5.50)                             | 2929         | 2833         | 2414         | 2148         | 1348         | 722          | NA           |
| Genes retired (compared with r5.50)                           | 1932         | 1829         | 1394         | 776          | 588          | 371          | NA           |
| Genes with different genome location (compared with r5.50)    | 10487        | 10508        | 9985         | 9372         | 8811         | 7728         | NA           |
| All transcripts                                               | 21707        | 21984        | 22661        | 22938        | 24523        | 27055        | 30933        |
| Transcripts added (compared with r5.50)                       | 13674        | 13211        | 11572        | 10447        | 8395         | 5195         | NA           |
| Transcripts retired (compared with r5.50)                     | 4498         | 4262         | 3300         | 2452         | 2124         | 1498         | NA           |
| Transcripts with different sequence (compared with r5.50)     | 13730        | 14040        | 14098        | 13665        | 13471        | 12889        | NA           |
| Transcripts with different CDS sequence (compared with r5.50) | 47           | 4            | 2            | 1            | 0            | 1            | NA           |
| Genes with any transcript changes (compared with r5.50)       | 10095        | 10200        | 10016        | 9613         | 9247         | 8258         | NA           |
| WormBase release                                              | WS170        | WS190        | WS200        | WS212        | WS225        | WS230        | WS237        |
| Date                                                          | 2007-<br>Feb | 2008-<br>May | 2009-<br>Mar | 2010-<br>Mar | 2011-<br>Apr | 2012-<br>Mar | 2013-<br>Apr |
| All transcripts                                               | 27322        | 27417        | 27687        | 28278        | 30745        | 31249        | 28983        |
| Transcripts added (compared with WS237)                       | 8574         | 7128         | 6672         | 5538         | 4483         | 2928         | NA           |
| Transcripts retired (compared with WS237)                     | 6913         | 5562         | 5376         | 4833         | 6245         | 5194         | NA           |
| Transcripts with different CDS sequence (compared with WS237) | 3162         | 2440         | 2048         | 1603         | 1077         | 618          | NA           |
